# Supplementary material for: A randomised, double-blind, multicentre, parallel-group, prospective study comparing the pharmacokinetics, safety, and efficacy of CT-P13 and innovator infliximab in patients with ankylosing spondylitis: the PLANETAS study
Source: HighWire-hosted journal article supplement (doi:10.1136/annrheumdis-2012-203091), 2013-05-18

## Appendix E.

Proportion of patients achieving ASAS responses (20% and 40%) with CT-P13 (5 mg/kg) or INX (5 mg/kg) at week 14 and week 30 in the all randomised population (CT-P13: N=125; INX: N=125).

Figure S2-1. ASAS20 rates at weeks 14 and 30

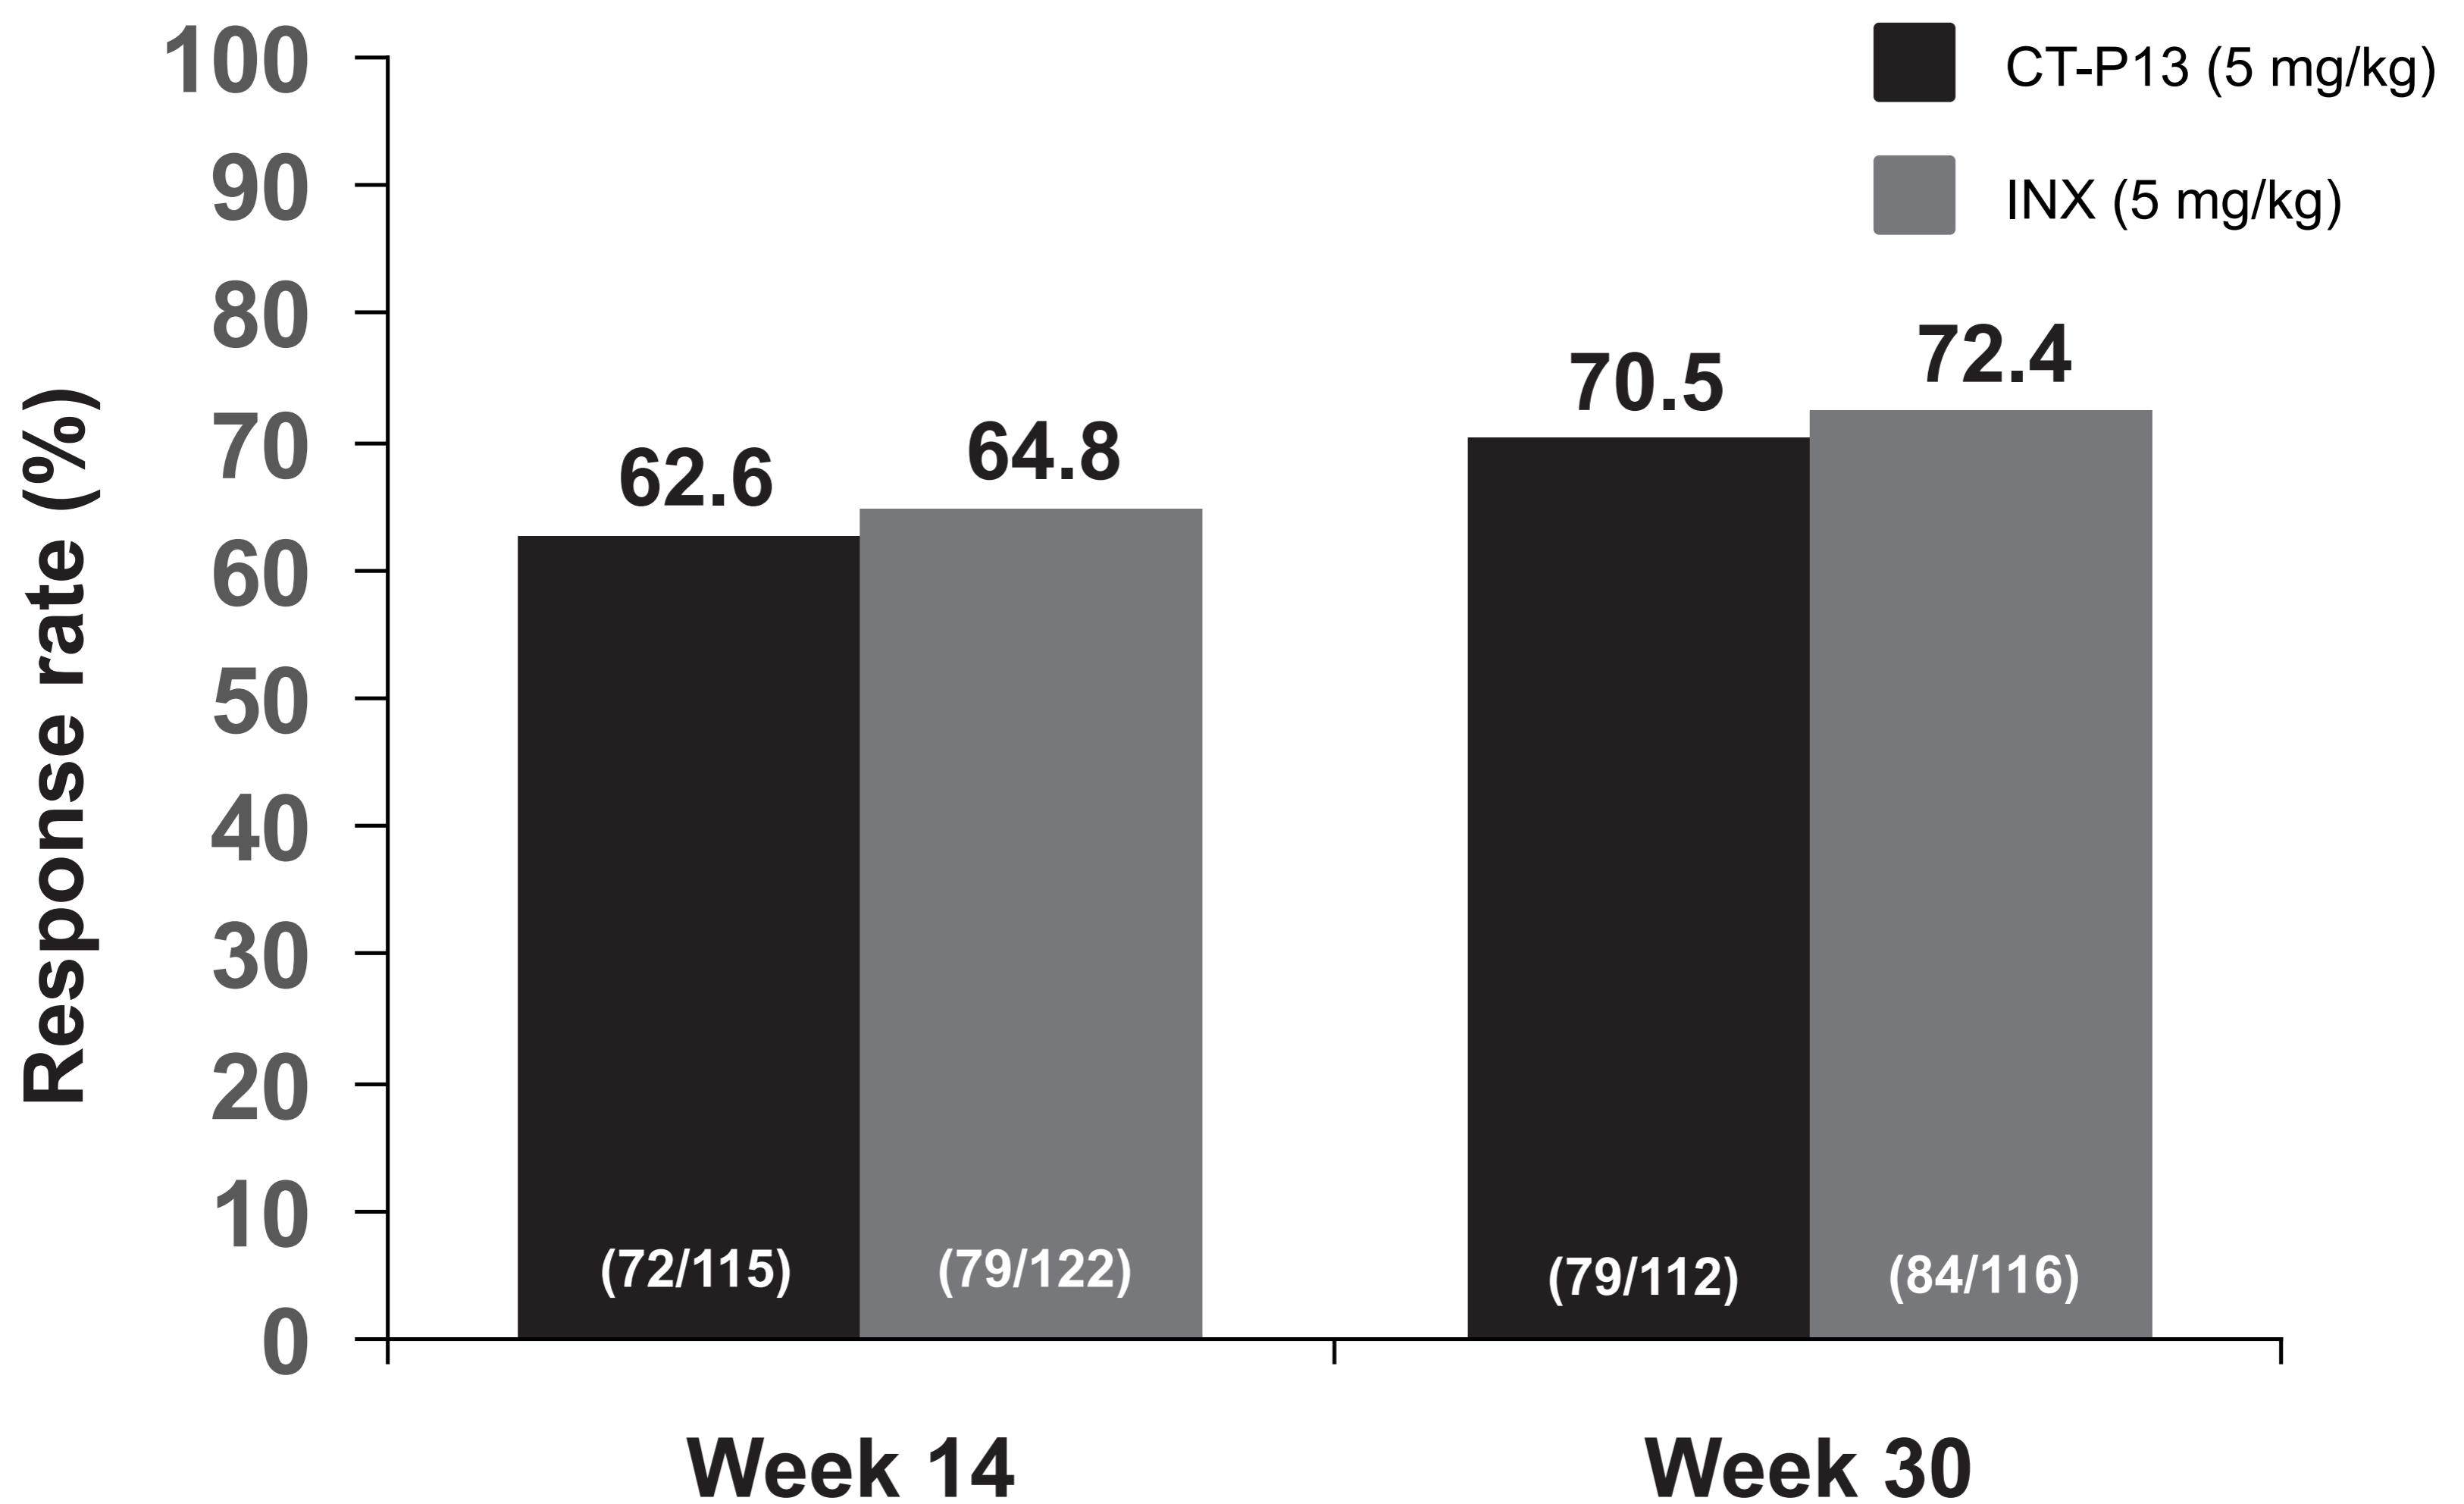

Figure S2-2. ASAS40 rates at weeks 14 and 30

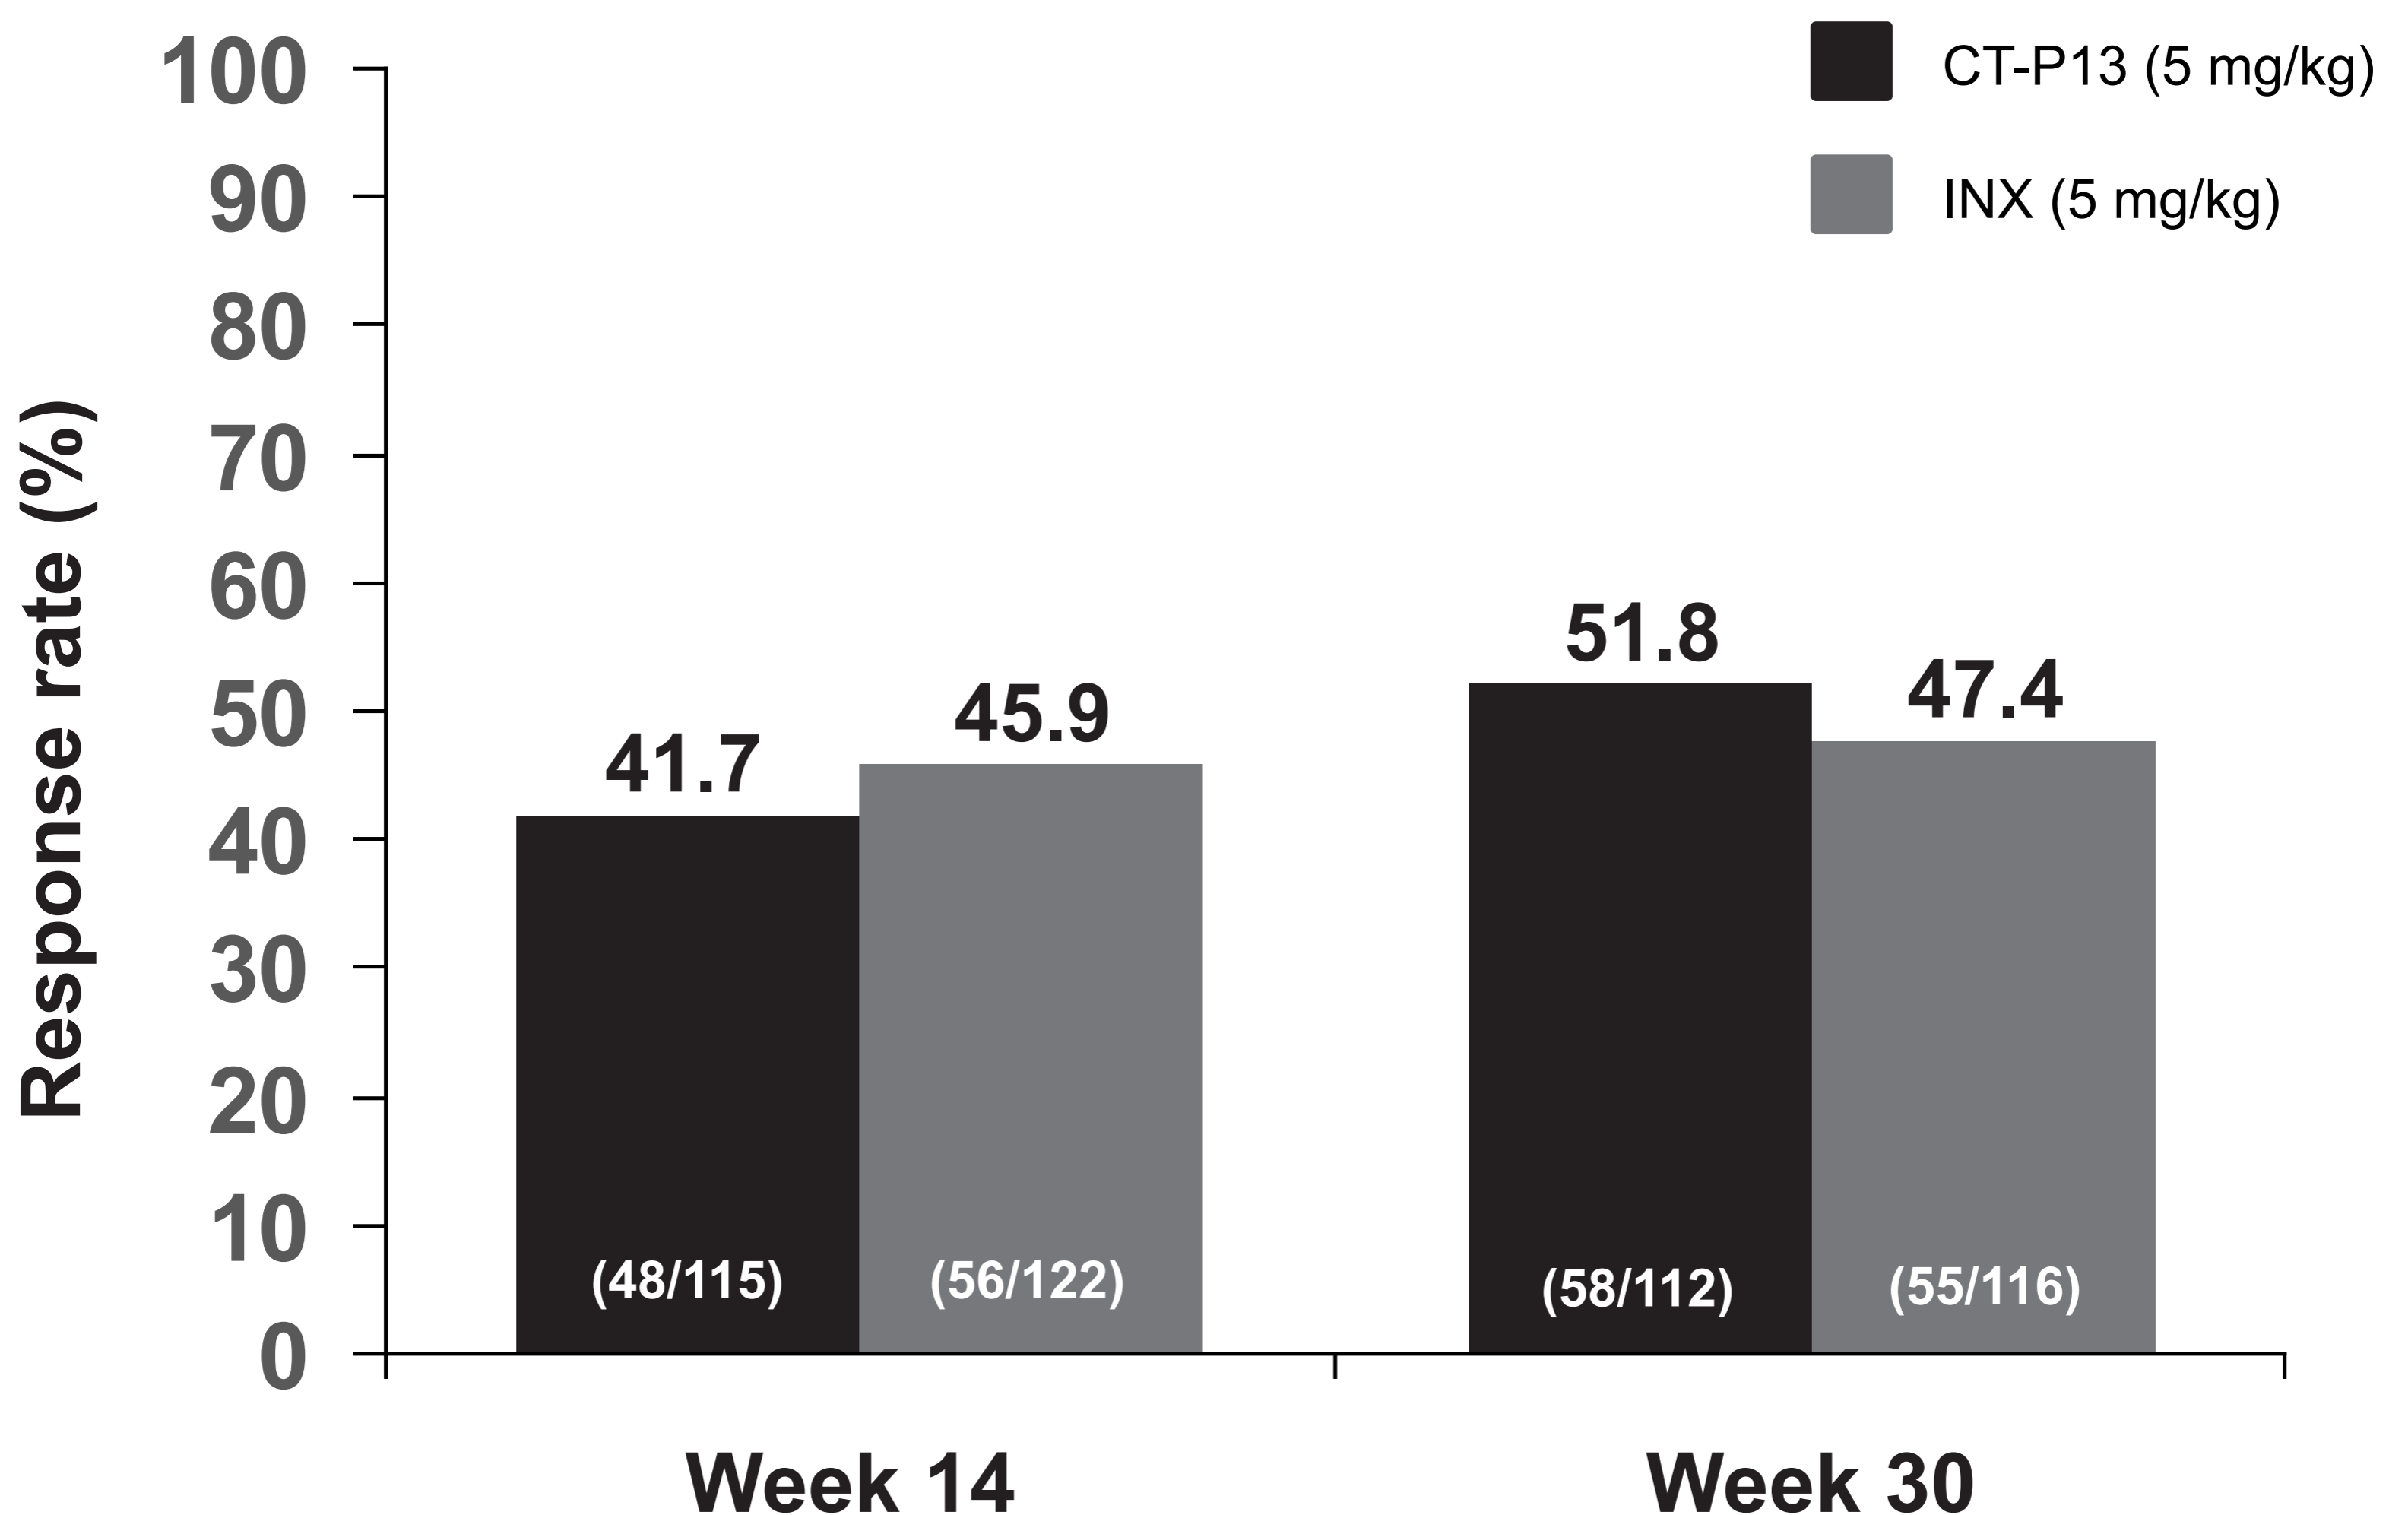

Supplement: annrheumdis-2012-203091supp_appendixE.pdf [file annrheumdis-2012-203091supp_appendixE.pdf]
