# Supplementary material for: A randomised, double-blind, multicentre, parallel-group, prospective study comparing the pharmacokinetics, safety, and efficacy of CT-P13 and innovator infliximab in patients with ankylosing spondylitis: the PLANETAS study
Source: HighWire-hosted journal article supplement (doi:10.1136/annrheumdis-2012-203091), 2013-05-18
Supplement: annrheumdis-2012-203091supp_appendixF.pdf [file annrheumdis-2012-203091supp_appendixF.pdf]

## Appendix F

**Table S2. ASAS20 and ASAS40 responses according to ADA status at week 30.**

|                     | Treatment                               | n  | N  | (%)  | Odds ratio [1] | 95% CI of the odds ratio |
|---------------------|-----------------------------------------|----|----|------|----------------|--------------------------|
| <b>ADA positive</b> |                                         |    |    |      |                |                          |
| ASAS20              | CT-P13 5 mg/kg                          | 14 | 28 | 50.0 | 0.47           | ( 0.14, 1.53)            |
|                     | INX 5 mg/kg                             | 17 | 26 | 65.4 |                |                          |
|                     | Goodness-of-fit test (p-value0.487) [2] | .  | .  |      |                |                          |
| ASAS40              | CT-P13 5 mg/kg                          | 12 | 28 | 42.9 | 1.45           | ( 0.45, 4.70)            |
|                     | INX 5 mg/kg                             | 10 | 26 | 38.5 |                |                          |
|                     | Goodness-of-fit test (p-value0.939) [2] | .  | .  |      |                |                          |
| <b>ADA negative</b> |                                         |    |    |      |                |                          |
| ASAS20              | CT-P13 5 mg/kg                          | 65 | 84 | 77.4 | 1.15           | ( 0.57, 2.31)            |
|                     | INX 5 mg/kg                             | 67 | 90 | 74.4 |                |                          |
|                     | Goodness-of-fit test (p-value0.488) [2] | .  | .  |      |                |                          |
| ASAS40              | CT-P13 5 mg/kg                          | 46 | 84 | 54.8 | 1.18           | ( 0.65, 2.15)            |
|                     | INX 5 mg/kg                             | 45 | 90 | 50.0 |                |                          |
|                     | Goodness-of-fit test (p-value0.93) [2]  | .  | .  |      |                |                          |

Note: N = the number of subjects with an assessment. n = the number of subjects with the event. (%)= n/N\*100. INX = innovator infliximab

[1] The odds ratio was estimated using a logistic regression model with treatment as a fixed effect, and region and baseline BASDAI score as covariates.

An odds ratio of >1 indicates an increased odds in favor of CT-P13 5mg/kg.

[2] The p-value is calculated using the Hosmer-Lemeshow test for the goodness-of-fit of the logistic regression model. The test is significant at the 5% level.
